# Supplementary material
Source: MDPI journal article supplement (https://www.mdpi.com/2311-5637/7/3/183)
Supplement: s1 [file s1]

**Table S1.** Heat map of the concentration of volatile compounds (mg/L) in the wines obtained by sequential fermentation with non-*Saccharomyces* yeasts + *S. cerevisiae* EC1118 and with *S. cerevisiae* as a monoculture and significance according to one-way ANOVA. The darkest green indicates the highest content, and the darkest red the lowest content of each compound.

|                             | Hv129   | Sb474   | Mf278   | Lt93    | Td315   | Hu95    | Mp176   | Pk158   | Kd231   | Zba314  | Zp181   | Ca31    | Pkl88   | EC1118  | Sig. |
|-----------------------------|---------|---------|---------|---------|---------|---------|---------|---------|---------|---------|---------|---------|---------|---------|------|
| <i>Alcohols</i>             |         |         |         |         |         |         |         |         |         |         |         |         |         |         |      |
| Isobutanol                  | 21,117  | 39,230  | 45,322  | 34,773  | 37,781  | 23,626  | 27,819  | 25,170  | 132,247 | 29,629  | 24,738  | 25,741  | 21,052  | 18,390  | ***  |
| 1-Butanol                   | 0,907   | 0,508   | 0,677   | 0,804   | 1,311   | 0,767   | 0,623   | 0,803   | 1,065   | 0,954   | 0,717   | 0,664   | 0,789   | 0,745   | ***  |
| Isoamyl alcohol             | 173,800 | 146,235 | 214,458 | 211,308 | 233,293 | 188,557 | 206,734 | 207,567 | 457,973 | 161,113 | 157,872 | 186,124 | 187,722 | 210,502 | ***  |
| 1-Hexanol                   | 0,583   | 0,529   | 0,401   | 0,549   | 0,670   | 0,635   | 0,384   | 0,334   | 0,672   | 0,728   | 0,698   | 0,588   | 0,237   | 0,588   | ***  |
| c-3-Hexenol                 | 0,100   | 0,093   | 0,084   | 0,086   | 0,115   | 0,081   | 0,084   | 0,064   | 0,105   | 0,094   | 0,087   | 0,091   | 0,045   | 0,086   | ***  |
| Methionol                   | 1,902   | 2,096   | 1,602   | 2,136   | 6,353   | 1,695   | 1,770   | 2,106   | 3,795   | 5,056   | 3,540   | 1,986   | 1,611   | 1,618   | ***  |
| Benzyl alcohol              | 0,141   | 0,231   | 0,146   | 0,098   | 0,129   | 0,116   | 0,123   | 0,143   | 0,110   | 0,104   | 0,109   | 0,178   | 0,111   | 0,115   | ***  |
| β-Phenylethanol             | 26,981  | 42,079  | 51,140  | 38,718  | 75,940  | 39,328  | 47,789  | 44,047  | 42,698  | 39,241  | 35,927  | 42,338  | 35,785  | 42,429  | ***  |
| <i>Esters</i>               |         |         |         |         |         |         |         |         |         |         |         |         |         |         |      |
| Isoamyl acetate             | 0,056   | 0,197   | 0,176   | 0,098   | 0,056   | 0,127   | 0,139   | 0,133   | 0,193   | 0,063   | 0,056   | 0,116   | 0,535   | 0,124   | ***  |
| Ethyl propanoate            | 0,050   | 0,177   | 0,130   | 0,146   | 0,062   | 0,186   | 0,113   | 0,202   | 0,076   | 0,148   | 0,280   | 0,092   | 0,282   | 0,091   | ***  |
| Ethyl hexanoate             | 0,089   | 0,404   | 0,358   | 0,127   | 0,022   | 0,252   | 0,281   | 0,330   | 0,049   | 0,049   | 0,046   | 0,295   | 0,473   | 0,313   | ***  |
| Ethyl octanoate             | 0,062   | 0,155   | 0,208   | 0,028   | 0,010   | 0,149   | 0,186   | 0,228   | 0,010   | 0,010   | 0,010   | 0,207   | 0,358   | 0,216   | ***  |
| Ethyl decanoate             | 0,063   | 0,051   | 0,070   | 0,016   | 0,023   | 0,055   | 0,073   | 0,084   | 0,027   | 0,034   | 0,017   | 0,064   | 0,097   | 0,061   | ***  |
| <i>Volatile fatty acids</i> |         |         |         |         |         |         |         |         |         |         |         |         |         |         |      |
| Butyric acid                | 0,182   | 0,109   | 0,050   | 0,059   | 0,089   | 0,077   | 0,067   | 0,058   | 0,089   | 0,093   | 0,083   | 0,095   | 0,056   | 0,029   | *    |
| Isobutyric acid             | 4,390   | 3,324   | 0,934   | 1,721   | 3,037   | 1,476   | 1,892   | 2,880   | 4,908   | 4,534   | 3,499   | 4,130   | 2,781   | 2,393   | ***  |
| Isovaleric acid             | 4,031   | 1,031   | 1,031   | 1,031   | 1,031   | 1,031   | 1,031   | 1,031   | 1,031   | 1,031   | 1,031   | 1,031   | 1,031   | 1,031   | **   |
| Hexanoic acid               | 1,241   | 1,288   | 2,143   | 0,706   | 0,235   | 1,084   | 1,726   | 1,863   | 0,339   | 0,481   | 0,541   | 1,596   | 1,896   | 1,154   | ***  |
| Octanoic acid               | 1,212   | 1,205   | 2,762   | 0,779   | 0,193   | 1,960   | 2,661   | 2,492   | 0,496   | 0,322   | 0,462   | 2,534   | 3,220   | 2,496   | ***  |
| Decanoic acid               | 0,219   | 0,161   | 0,505   | 0,079   | 0,170   | 1,298   | 0,211   | 0,165   | 0,141   | 0,060   | 0,010   | 0,067   | 0,196   | 0,144   | ***  |
| <i>Other compounds</i>      |         |         |         |         |         |         |         |         |         |         |         |         |         |         |      |
| Acetaldehyde                | 5,853   | 3,335   | 4,750   | 7,772   | 4,831   | 4,440   | 4,131   | 3,963   | 8,601   | 5,778   | 7,629   | 8,495   | 6,733   | 4,396   | **   |
| Diacetyl                    | 0,110   | 0,019   | 0,066   | 0,084   | 0,010   | 0,135   | 0,079   | 0,120   | 0,089   | 0,076   | 0,187   | 0,177   | 0,303   | 0,035   | *    |

|                         |        |        |        |        |        |         |        |        |        |        |        |        |        |        |     |
|-------------------------|--------|--------|--------|--------|--------|---------|--------|--------|--------|--------|--------|--------|--------|--------|-----|
| Acetoin                 | 6,770  | 4,539  | 5,451  | 8,776  | 6,344  | 6,877   | 4,131  | 7,727  | 12,034 | 13,971 | 15,853 | 5,997  | 10,645 | 3,289  | *** |
| <b>Ethyl acetate</b>    | 90,932 | 59,659 | 49,328 | 37,336 | 11,462 | 153,812 | 51,057 | 73,105 | 24,190 | 46,656 | 50,214 | 44,463 | 88,752 | 42,955 | *** |
| Ethyl lactate           | 2,867  | 2,216  | 3,012  | 67,773 | 5,049  | 3,610   | 3,278  | 2,917  | 2,402  | 5,754  | 5,358  | 4,331  | 2,559  | 3,282  | *** |
| Diethyl succinate       | 0,539  | 0,695  | 2,439  | 1,307  | 3,133  | 4,165   | 4,991  | 7,811  | 4,762  | 3,662  | 4,384  | 6,051  | 6,660  | 5,658  | *** |
| $\gamma$ -Butyrolactone | 5,764  | 19,363 | 8,371  | 7,779  | 7,256  | 5,591   | 7,667  | 6,881  | 8,275  | 12,774 | 12,393 | 12,443 | 5,130  | 6,968  | *** |

The data are mean values of three repetitions. Compounds in bold indicate concentration above their OAV. \*, \*\* and \*\*\* indicate significant differences among wines at  $p < 0.05$ ,  $p < 0.01$  and  $p < 0.001$ , respectively, according to Tuckey's test.
